# Supplementary material for: Investigation of the interfacial behavior of organics on sulfide semiconductor surfaces by quantum chemical calculations and molecular dynamics simulations
Source: Royal Society of Chemistry journal article supplement (doi:10.1039/d1nj02939h), 2021-01-01
Supplement: d1nj02939h1.pdf [file d1nj02939h1.pdf]

## Electronic Supplementary Information

### Investigation of the interfacial behavior of organics on the sulfide semiconductor surface by quantum chemical calculation and molecular dynamic simulation

Haiding Zhu <sup>a</sup>, Xuefeng Ren <sup>b, \*</sup>, Shengxiang Yan <sup>a</sup>, Xingyou Liang <sup>a</sup>, Liguao Gao <sup>a</sup>,  
Yanqiang Li <sup>a</sup>, Qidong Zhao<sup>a</sup>, Tingli Ma <sup>c, d</sup>, Anmin Liu <sup>a, \*</sup>

<sup>a</sup> State Key Laboratory of Fine Chemicals, School of Chemical Engineering, Dalian University of Technology, China.

E-mail: [anmin0127@163.com](mailto:anmin0127@163.com), [liuanmin@dlut.edu.cn](mailto:liuanmin@dlut.edu.cn)

<sup>b</sup> School of Ocean Science and Technology, Dalian University of Technology, Panjin, 124221, China.

E-mail: [renxuefeng@dlut.edu.cn](mailto:renxuefeng@dlut.edu.cn)

<sup>c</sup> Department of Materials Science and Engineering, China Jiliang University, Hangzhou, 310018, China.

<sup>d</sup> Graduate School of Life Science and Systems Engineering, Kyushu Institute of Technology, 2-4 Hibikino, Wakamatsu, Kitakyushu, Fukuoka 808-0196, Japan.

Table. S1 the surface of the sulfide semiconductor used in the experiment

| semiconductor | CdS     | CdS     | ZnS     | MoS <sub>2</sub> | SnS     |
|---------------|---------|---------|---------|------------------|---------|
| surface       | (1,1,1) | (1,0,1) | (1,1,1) | (0,0,2)          | (1,1,1) |

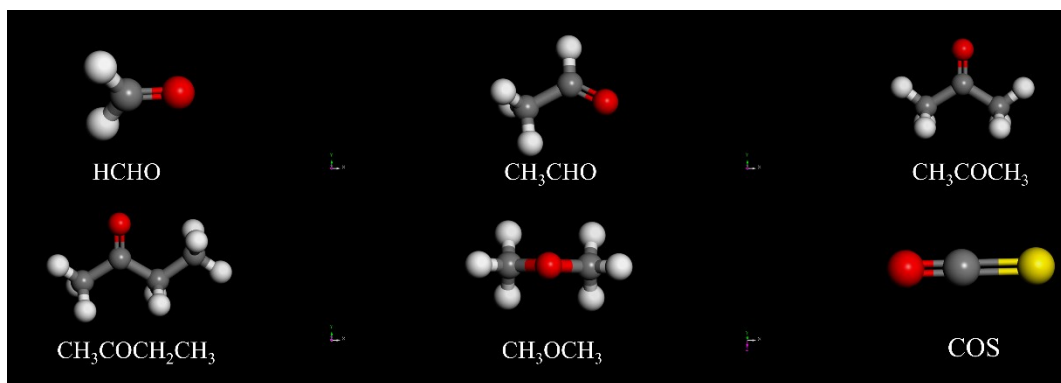

Fig. S1 ball and stick models of HCHO, CH<sub>3</sub>CHO, CH<sub>3</sub>COCH<sub>3</sub>, CH<sub>3</sub>COCH<sub>2</sub>CH<sub>3</sub>, CH<sub>3</sub>OCH<sub>3</sub>, COS

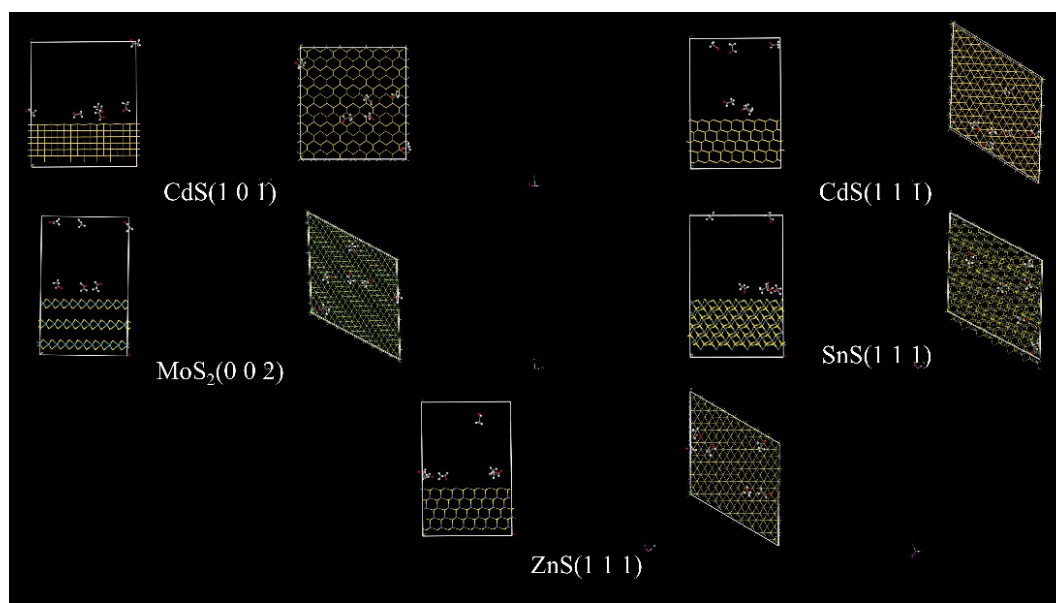

Fig. S2 The final configuration of the simulation box with gas phase CH<sub>3</sub>CHO molecule on sulfide semiconductors.

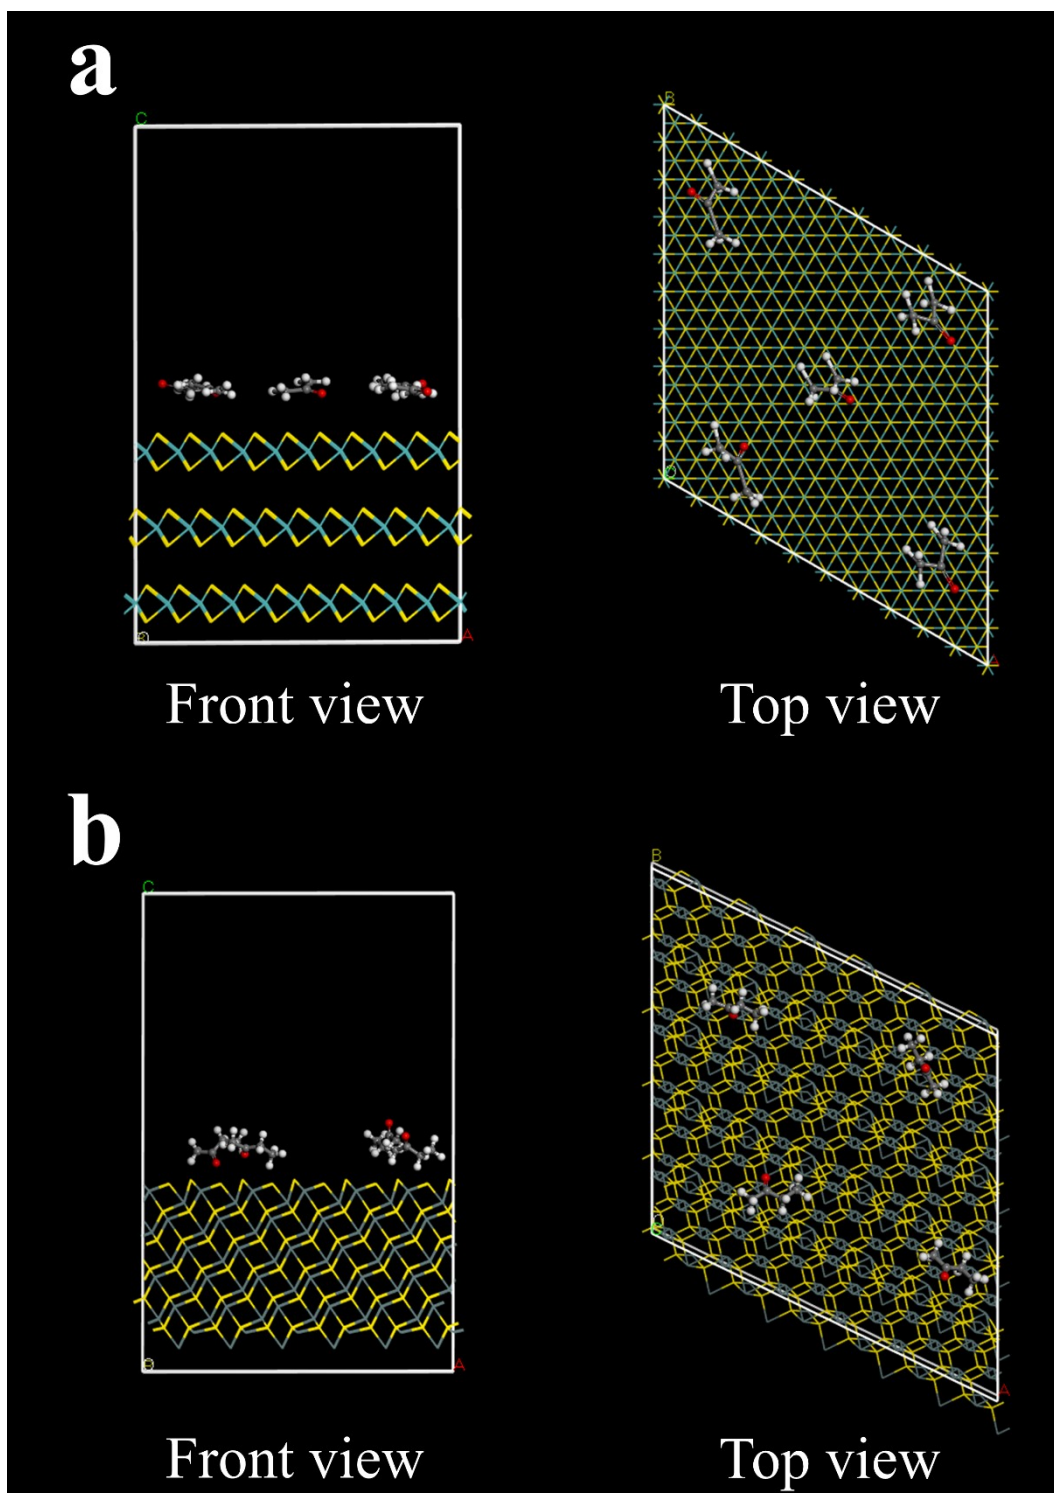

Fig. S3 a. The initial state of the simulation box containing  $\text{CH}_3\text{COCH}_3$  molecules and  $\text{MoS}_2$  (0 0 2) semiconductors; b. The initial state of the simulation box containing  $\text{CH}_3\text{COCH}_2\text{CH}_3$  molecules and  $\text{SnS}$  (1 1 1) semiconductors

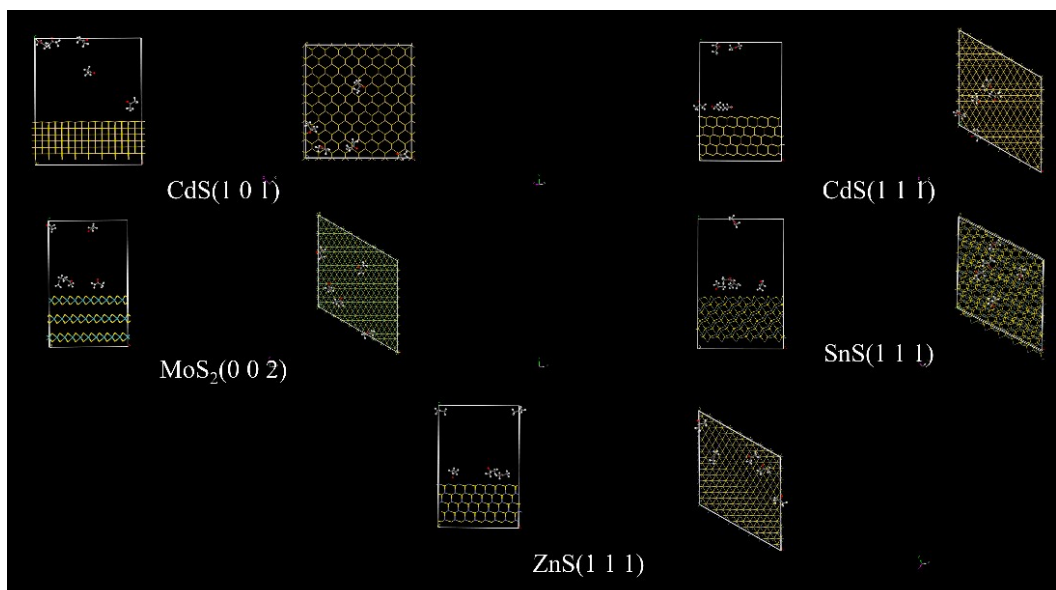

Fig. S4 The final configuration of the simulation box with gas phase  $\text{CH}_3\text{COCH}_3$  molecule on sulfide semiconductors.

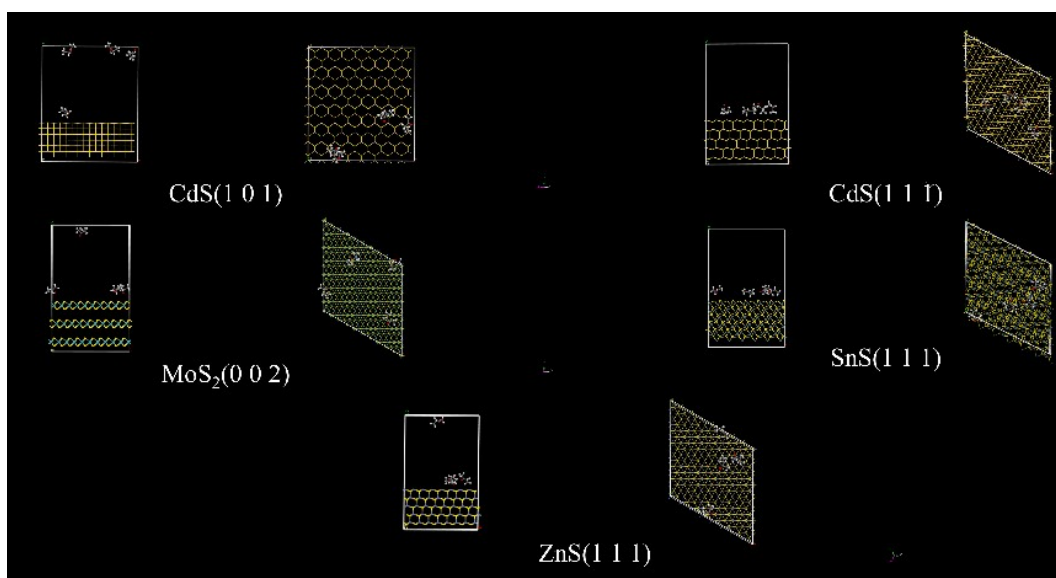

Fig. S5 The final configuration of the simulation box with gas phase  $\text{CH}_3\text{COCH}_2\text{CH}_3$  molecule on sulfide semiconductors.

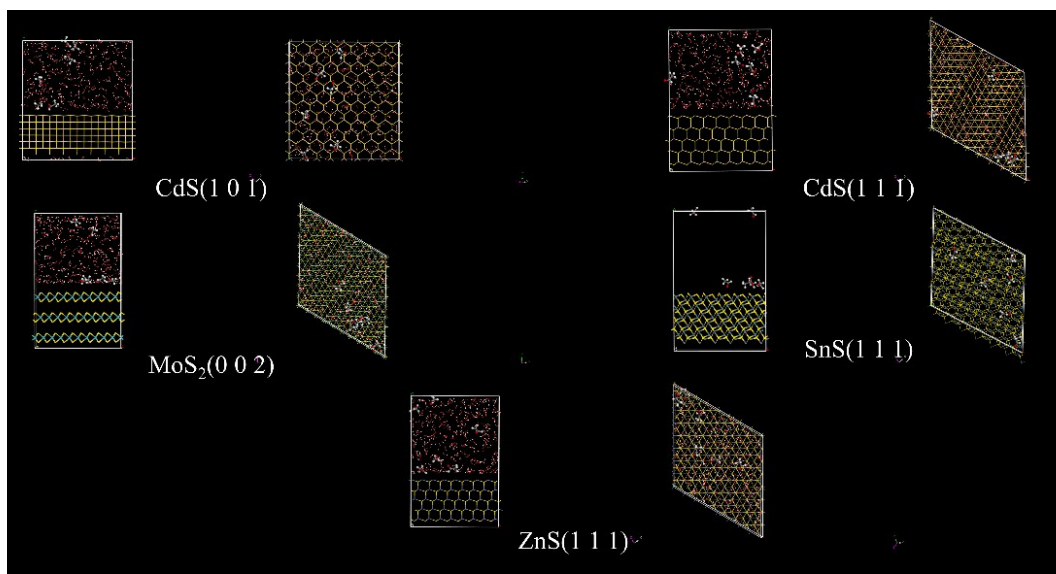

Fig. S6 The final configuration of the simulation box with water phase  $\text{CH}_3\text{CHO}$  molecule on sulfide semiconductors.

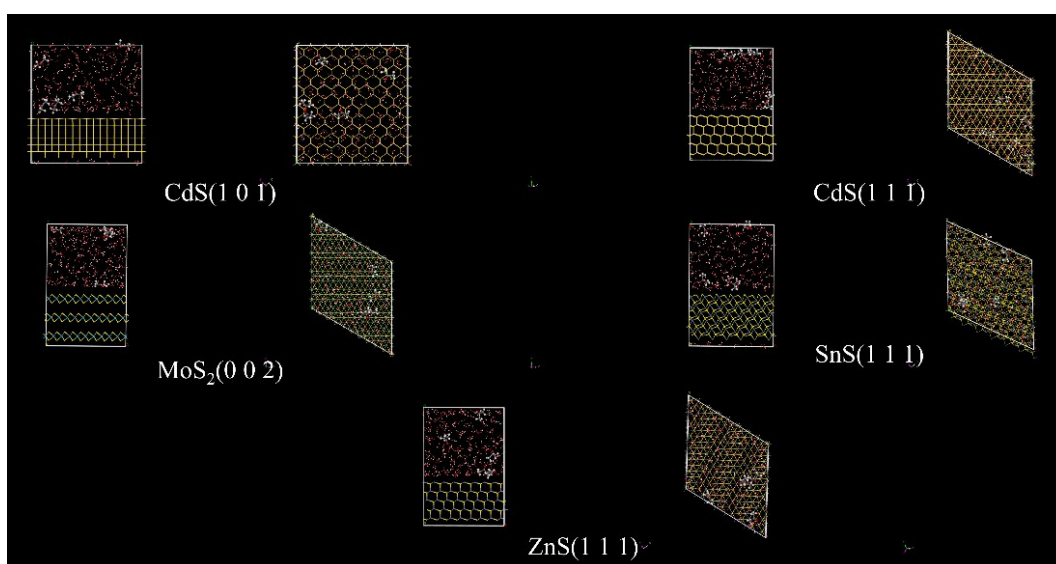

Fig. S7 The final configuration of the simulation box with water phase  $\text{CH}_3\text{COCH}_3$  molecule on sulfide semiconductors.

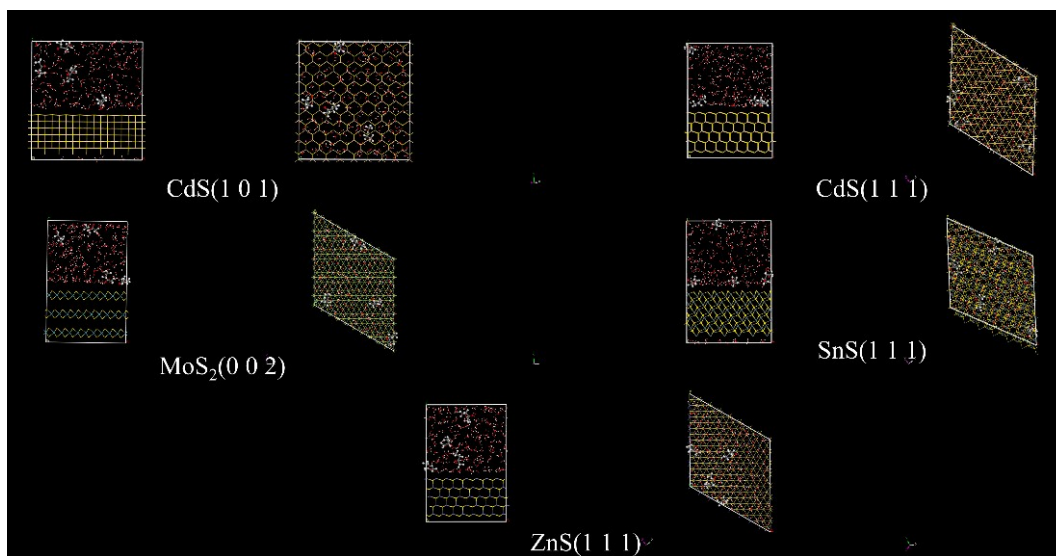

Fig. S8 The final configuration of the simulation box with water phase  $\text{CH}_3\text{COCH}_2\text{CH}_3$  molecule on sulfide semiconductors.

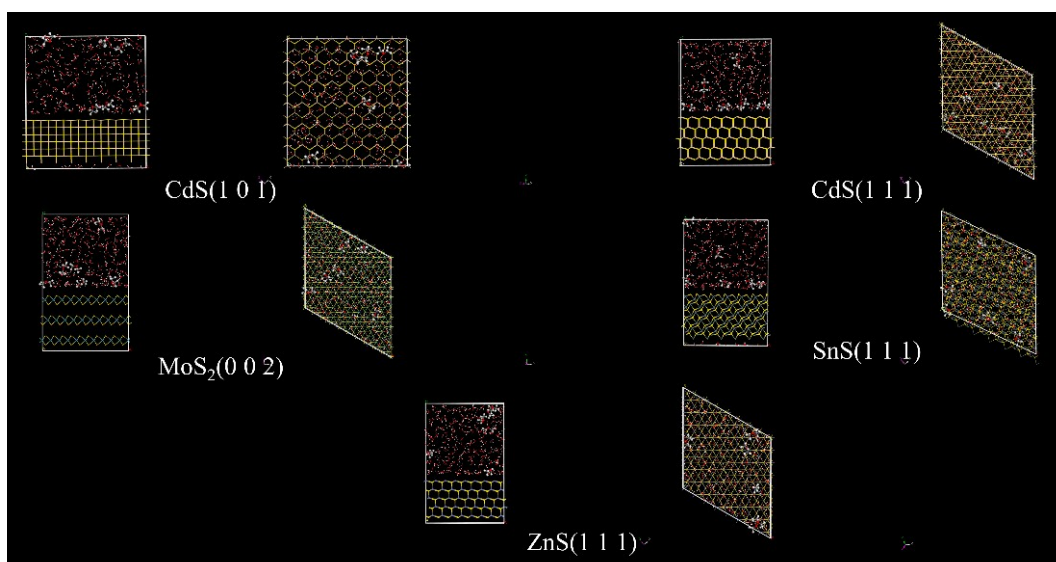

Fig. S9 The final configuration of the simulation box with water phase  $\text{CH}_3\text{OCH}_3$  molecule on sulfide semiconductors.



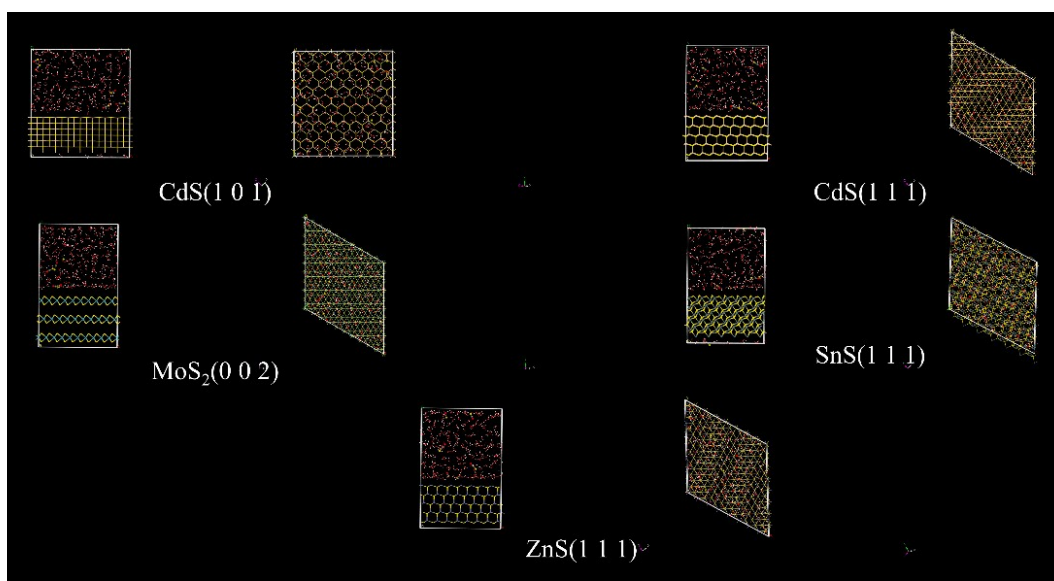

Fig. S10 The final configuration of the simulation box with water phase COS molecule on sulfide semiconductors.

Table S2 Experimental results of adsorption of HCHO molecules on the surface of various sulfide semiconductor materials in gas phase conditions

| semiconductors   | Cut crystal face | Total energy (kcal/mol) | semiconductors energy (kcal/mol) | HCHO energy (kcal/mol) | Adsorption energy (kcal/mol) |
|------------------|------------------|-------------------------|----------------------------------|------------------------|------------------------------|
| CdS              | 111              | 4530.6                  | 4523.1                           | 14.276                 | -6.776                       |
| CdS              | 101              | 4124.2                  | 4111.6                           | 16.709                 | -4.109                       |
| MoS <sub>2</sub> | 002              | 49888                   | 49880                            | 18.576                 | -10.576                      |
| SnS              | 111              | 45780                   | 45768                            | 24.518                 | -12.518                      |
| ZnS              | 111              | 3925.2                  | 3919.6                           | 10.290                 | -4.690                       |

Table S3 Experimental results of adsorption of CH<sub>3</sub>CHO molecules on the surface of various sulfide semiconductor materials in the gas phase

| semiconductors   | Cut crystal face | Total energy (kcal/mol) | semiconductors energy (kcal/mol) | HCHO energy (kcal/mol) | Adsorption energy (kcal/mol) |
|------------------|------------------|-------------------------|----------------------------------|------------------------|------------------------------|
| CdS              | 111              | 4551.0                  | 4523.4                           | 30.750                 | -3.150                       |
| CdS              | 101              | 4132.5                  | 4111.6                           | 33.104                 | -12.204                      |
| MoS <sub>2</sub> | 002              | 49889                   | 49880                            | 27.673                 | -18.673                      |
| SnS              | 111              | 45780                   | 45766                            | 36.074                 | -22.074                      |
| ZnS              | 111              | 3936.2                  | 3919.5                           | 27.449                 | -10.749                      |

Table S4 Experimental results of adsorption of CH<sub>3</sub>COCH<sub>3</sub> molecules on the surface of various sulfide semiconductor materials in the gas phase

| semiconductors   | Cut crystal face | Total energy (kcal/mol) | semiconductors energy (kcal/mol) | CH <sub>3</sub> COCH <sub>3</sub> energy (kcal/mol) | Adsorption energy (kcal/mol) |
|------------------|------------------|-------------------------|----------------------------------|-----------------------------------------------------|------------------------------|
| CdS              | 111              | 4555.0                  | 4522.8                           | 46.370                                              | -14.170                      |
| CdS              | 101              | 4138.6                  | 4111.4                           | 39.520                                              | -12.320                      |
| MoS <sub>2</sub> | 002              | 49898                   | 49880                            | 42.574                                              | -24.574                      |
| SnS              | 111              | 45785                   | 45766                            | 43.052                                              | -24.052                      |
| ZnS              | 111              | 3944.4                  | 3919.2                           | 39.483                                              | -14.283                      |

Table S5 Experimental results of adsorption of CH<sub>3</sub>COCH<sub>2</sub>CH<sub>3</sub> molecules on the surface of various sulfide semiconductor materials in the gas phase

| semiconductors   | Cut crystal face | Total energy (kcal/mol) | semiconductors energy (kcal/mol) | CH <sub>3</sub> COCH <sub>2</sub> CH <sub>3</sub> energy (kcal/mol) | Adsorption energy (kcal/mol) |
|------------------|------------------|-------------------------|----------------------------------|---------------------------------------------------------------------|------------------------------|
| CdS              | 111              | 4551.6                  | 4522.8                           | 50.042                                                              | -21.242                      |
| CdS              | 101              | 4158.7                  | 4111.4                           | 55.611                                                              | -8.311                       |
| MoS <sub>2</sub> | 002              | 49908                   | 49880                            | 45.878                                                              | -17.878                      |
| SnS              | 111              | 45777                   | 45766                            | 45.063                                                              | -34.063                      |
| ZnS              | 111              | 3970.9                  | 3919.2                           | 60.952                                                              | -9.252                       |

Table S6 Experimental results of adsorption of CH<sub>3</sub>OCH<sub>3</sub> molecules on the surface of various sulfide semiconductor materials in the gas phase

| semiconductors   | Cut crystal face | Total energy (kcal/mol) | semiconductors energy (kcal/mol) | CH <sub>3</sub> OCH <sub>3</sub> energy (kcal/mol) | Adsorption energy (kcal/mol) |
|------------------|------------------|-------------------------|----------------------------------|----------------------------------------------------|------------------------------|
| CdS              | 111              | 4575.5                  | 4523.2                           | 66.664                                             | -14.364                      |
| CdS              | 101              | 4166.3                  | 4111.7                           | 69.648                                             | -15.048                      |
| MoS <sub>2</sub> | 002              | 49926                   | 49880                            | 61.511                                             | -15.511                      |
| SnS              | 111              | 45807                   | 45768                            | 63.945                                             | -24.945                      |
| ZnS              | 111              | 3977.7                  | 3919.7                           | 65.774                                             | -7.774                       |



Table S7 Experimental results of adsorption of COS molecules on the surface of various sulfide semiconductor materials in the gas phase

| semiconductors   | Cut<br>crystal<br>face | Total energy<br>(kcal/mol) | semiconductors<br>energy (kcal/m<br>ol) | COS<br>energy (kcal/m<br>ol) | Adsorption<br>energy<br>(kcal/mol) |
|------------------|------------------------|----------------------------|-----------------------------------------|------------------------------|------------------------------------|
| CdS              | 111                    | 4522.5                     | 4523.1                                  | 5.7532                       | -6.353                             |
| CdS              | 101                    | 4111.6                     | 4111.6                                  | 6.7370                       | -6.737                             |
| MoS <sub>2</sub> | 002                    | 49873                      | 49880                                   | 4.6656                       | -11.666                            |
| SnS              | 111                    | 45756                      | 45767                                   | 10.838                       | -21.838                            |
| ZnS              | 111                    | 3918.5                     | 3919.5                                  | 8.6393                       | -9.639                             |

Table S8 Experimental results of adsorption of HCHO molecules on the surface of various sulfide semiconductor materials in the water phase

| semiconductors   | Cut<br>crystal<br>face | Total energy<br>(kcal/mol) | semiconductors<br>energy (kcal/m<br>ol) | HCHO<br>energy (kcal/m<br>ol) | Adsorption<br>energy<br>(kcal/mol) |
|------------------|------------------------|----------------------------|-----------------------------------------|-------------------------------|------------------------------------|
| CdS              | 111                    | 4524.4                     | 4523.5                                  | 10.119                        | -9.219                             |
| CdS              | 101                    | 4114.2                     | 4112.3                                  | 10.747                        | -8.847                             |
| MoS <sub>2</sub> | 002                    | 49879                      | 49881                                   | 12.055                        | -14.055                            |
| SnS              | 111                    | 45766                      | 45769                                   | 12.664                        | -15.664                            |
| ZnS              | 111                    | 3925.4                     | 3919.6                                  | 13.141                        | -7.341                             |

Table S9 Experimental results of adsorption of CH<sub>3</sub>CHO molecules on the surface of various sulfide semiconductor materials in the water phase

| semiconductors   | Cut<br>crystal<br>face | Total energy<br>(kcal/mol) | semiconductors<br>energy (kcal/m<br>ol) | CH <sub>3</sub> CHO<br>energy (kcal/m<br>ol) | Adsorption<br>energy<br>(kcal/mol) |
|------------------|------------------------|----------------------------|-----------------------------------------|----------------------------------------------|------------------------------------|
| CdS              | 111                    | 4535.5                     | 4523.5                                  | 25.309                                       | -13.309                            |
| CdS              | 101                    | 4126.6                     | 4112.4                                  | 26.845                                       | -12.645                            |
| MoS <sub>2</sub> | 002                    | 49890                      | 49881                                   | 28.410                                       | -19.410                            |
| SnS              | 111                    | 45773                      | 45769                                   | 34.585                                       | -30.585                            |
| ZnS              | 111                    | 3931.3                     | 3919.6                                  | 23.270                                       | -11.570                            |

Table S10 Experimental results of adsorption of CH<sub>3</sub>COCH<sub>3</sub> molecules on the surface of various sulfide semiconductor materials in the water phase

| semiconductors   | Cut<br>crystal<br>face | Total energy<br>(kcal/mol) | semiconductors<br>energy (kcal/m<br>ol) | CH <sub>3</sub> COCH <sub>3</sub><br>energy (kcal/m<br>ol) | Adsorption<br>energy<br>(kcal/mol) |
|------------------|------------------------|----------------------------|-----------------------------------------|------------------------------------------------------------|------------------------------------|
| CdS              | 111                    | 4539.4                     | 4523.6                                  | 37.310                                                     | -21.510                            |
| CdS              | 101                    | 4140.0                     | 4112.4                                  | 38.343                                                     | -10.743                            |
| MoS <sub>2</sub> | 002                    | 49897                      | 49881                                   | 37.223                                                     | -21.223                            |
| SnS              | 111                    | 45781                      | 45769                                   | 40.026                                                     | -28.026                            |
| ZnS              | 111                    | 3938.4                     | 3919.6                                  | 39.650                                                     | -20.850                            |

Table S11 Experimental results of adsorption of CH<sub>3</sub>COCH<sub>2</sub>CH<sub>3</sub> molecules on the surface of various sulfide semiconductor materials in the water phase

| semiconductors   | Cut<br>crystal<br>face | Total energy<br>(kcal/mol) | semiconductors<br>energy (kcal/m<br>ol) | CH <sub>3</sub> COCH <sub>2</sub> CH <sub>3</sub><br>energy (kcal/m<br>ol) | Adsorption<br>energy<br>(kcal/mol) |
|------------------|------------------------|----------------------------|-----------------------------------------|----------------------------------------------------------------------------|------------------------------------|
| CdS              | 111                    | 4563.7                     | 4523.7                                  | 58.098                                                                     | -18.098                            |
| CdS              | 101                    | 4131.9                     | 4096.7                                  | 51.249                                                                     | -16.049                            |
| MoS <sub>2</sub> | 002                    | 49904                      | 49881                                   | 47.053                                                                     | -24.053                            |
| SnS              | 111                    | 45784                      | 45770                                   | 46.832                                                                     | -32.832                            |
| ZnS              | 111                    | 3947.6                     | 3919.8                                  | 48.039                                                                     | -20.239                            |

Table S12 Experimental results of adsorption of CH<sub>3</sub>OCH<sub>3</sub> molecules on the surface of various sulfide semiconductor materials in the water phase

| semiconductors   | Cut<br>crystal<br>face | Total energy<br>(kcal/mol) | semiconductors<br>energy (kcal/m<br>ol) | CH <sub>3</sub> OCH <sub>3</sub><br>energy (kcal/m<br>ol) | Adsorption<br>energy<br>(kcal/mol) |
|------------------|------------------------|----------------------------|-----------------------------------------|-----------------------------------------------------------|------------------------------------|
| CdS              | 111                    | 4578.1                     | 4523.7                                  | 71.380                                                    | -16.980                            |
| CdS              | 101                    | 4162.2                     | 4112.5                                  | 64.816                                                    | -15.116                            |
| MoS <sub>2</sub> | 002                    | 49922                      | 49881                                   | 66.591                                                    | -25.591                            |
| SnS              | 111                    | 45807                      | 45770                                   | 73.837                                                    | -36.837                            |
| ZnS              | 111                    | 3967.2                     | 3919.8                                  | 64.925                                                    | -17.525                            |

Table S13 Experimental results of adsorption of COS molecules on the surface of various sulfide semiconductor materials in the water phase

| semiconductors   | Cut<br>crystal<br>face | Total energy<br>(kcal/mol) | semiconductors<br>energy (kcal/m<br>ol) | COS<br>energy (kcal/m<br>ol) | Adsorption<br>energy<br>(kcal/mol) |
|------------------|------------------------|----------------------------|-----------------------------------------|------------------------------|------------------------------------|
| CdS              | 111                    | 4517.0                     | 4523.7                                  | 0.035869                     | -6.736                             |
| CdS              | 101                    | 4109.3                     | 4112.5                                  | 0.026119                     | -3.226                             |
| MoS <sub>2</sub> | 002                    | 49867                      | 49881                                   | 0.10562                      | -14.106                            |
| SnS              | 111                    | 45756                      | 45770                                   | 0.065389                     | -14.065                            |
| ZnS              | 111                    | 3909.2                     | 3919.8                                  | -0.19577                     | -10.4043                           |
